# Supplementary material
Source: Royal Society of Chemistry journal article supplement (doi:10.1039/d6cy00438e)
Supplement: d6cy00438e1.pdf [file d6cy00438e1.pdf]

## Supporting Information

### **Insights into the effective inhibition of green oil formation on the PdMo bimetallic catalyst in the selective hydrogenation of acetylene**

Ning He<sup>a</sup>, Junqi Pei<sup>a</sup>, Zixuan Zhang<sup>b</sup>, Ruijun Hou<sup>a\*</sup>

a. Beijing Key Laboratory of Green Hydrogen and Fuel Cells, School of Chemistry and Chemical Engineering, Beijing Institute of Technology, Beijing, 100081, People's Republic of China.

b. Daqing Huakai Petrochemical Design & Engineering Co. Ltd, Heilongjiang, People's Republic of China

# Contents

## 1. Methods

### 1.1 Volume change

### 1.2 Iteration method

### 1.3 Characterization details

## 2. Supplementary tables

Table S1. Apparent activation energies of the investigated catalysts

Table S2. Bader Charge for C<sub>2</sub>H<sub>2</sub> Stabilized Adsorption on Pd(111) and Pd<sub>1</sub>Mo<sub>1</sub>(111) Surfaces.

Table S3. Bader Charge for C<sub>2</sub>H<sub>4</sub> Stabilized Adsorption on Pd(111) and Pd<sub>1</sub>Mo<sub>1</sub>(111) Surfaces.

Table S4. Average Bader charge analysis for the stable adsorption of C<sub>2</sub>H<sub>2</sub> and C<sub>2</sub>H<sub>4</sub>.

Table S5. Activation barriers of the two most probable 1,3-butadiene formation pathways.

## 3. Supplementary figures

Figure S1. TEM images at 20 nm of (a) Pd/SiO<sub>2</sub>, (b) Pd<sub>3</sub>Mo<sub>1</sub>/SiO<sub>2</sub>, (c) Pd<sub>1</sub>Mo<sub>1</sub>/SiO<sub>2</sub>, (d)Pd<sub>1</sub>Mo<sub>3</sub>/SiO<sub>2</sub>.

Figure S2. EDS elemental mapping of the unsupported nanoparticles: (a<sub>1</sub>-a<sub>3</sub>) Pd/SiO<sub>2</sub>, (b<sub>1</sub>-b<sub>4</sub>) Pd<sub>3</sub>Mo<sub>1</sub>/SiO<sub>2</sub>, (c<sub>1</sub>-c<sub>4</sub>) Pd<sub>3</sub>Mo<sub>1</sub>/SiO<sub>2</sub> and (d<sub>1</sub>-d<sub>4</sub>) Pd<sub>1</sub>Mo<sub>3</sub>/SiO<sub>2</sub>.

Figure S3. Product selectivities at the different temperatures in acetylene hydrogenation: (a) ethylene, (b) ethane, and (c) green oil. (C<sub>2</sub>H<sub>2</sub> : H<sub>2</sub> : N<sub>2</sub>= 1:3:4; GHSV = 60000 mL g<sup>-1</sup> h<sup>-1</sup>).

Figure S4. TOFs normalized by surface sites over the investigated catalysts. (C<sub>2</sub>H<sub>2</sub> : H<sub>2</sub> : N<sub>2</sub>= 1:3:4; GHSV = 60000 mL g<sup>-1</sup> h<sup>-1</sup>).

Figure S5. Product selectivities as a function of acetylene conversion: (a) C<sub>4</sub>, (b) C<sub>6+</sub> and (c) oligomer. (C<sub>2</sub>H<sub>2</sub> : H<sub>2</sub> : N<sub>2</sub>= 1:3:4; GHSV = 60000 mL g<sup>-1</sup> h<sup>-1</sup>)

Figure S6. The optimized configurations of transition states involved in the acetylene hydrogenation on (a) Pd(111) and (b) Pd<sub>1</sub>Mo<sub>1</sub>(111) surfaces.

Figure S7. The optimized configurations of transition states involved in the acetylene dimerization reaction on (a) Pd(111) and (b) Pd<sub>1</sub>Mo<sub>1</sub>(111) surfaces.

## 1. Methods

### 1.1 Volume change

Volume change cannot be neglected in the high-concentration acetylene feed. Therefore, carbon balance is calculated based on the main reactions involved in acetylene hydrogenation. The produced green oil is assumed as alkene for simplification.

- a)  $C_2H_2 + H_2 \rightarrow C_2H_4$ ;
- b)  $C_2H_2 + 2H_2 \rightarrow C_2H_6$ ;
- c)  $2C_2H_2 + H_2 \rightarrow C_4H_6$  (1,3-butadiene)
- d)  $2C_2H_2 + 2H_2 \rightarrow C_4H_8$  (butenes)
- e)  $2C_2H_2 + 3H_2 \rightarrow C_4H_{10}$  (butanes)
- f)  $3C_2H_2 + 2H_2 \rightarrow C_6H_{10}$  (C6+)
- g)  $C_2H_2 + H_2 \rightarrow 2/nC_nH_{2n}$  (Green oil, liquid)

If the inlet gas composition is  $C_2H_2:H_2:N_2=1:3:4$ , the acetylene proportion of the inlet is 1/8.

With the conversion  $X$ , 1mol acetylene takes up the amount of hydrogen of

$$X \cdot S_{C_2H_4} + 2X \cdot S_{C_2H_6} + \frac{1}{2}X \cdot S_{C_4H_6} + X \cdot S_{C_4H_8} + \frac{3}{2}X \cdot S_{C_4H_{10}} + \frac{2}{3}X \cdot S_{C_6H_{10}} + X \cdot S_{GO} \quad (S1)$$

and produces the amount of gaseous carbon species of

$$1 - \frac{1}{2}X \cdot S_{C_4H_6} - \frac{1}{2}X \cdot S_{C_4H_8} - \frac{1}{2}X \cdot S_{C_4H_{10}} - \frac{2}{3}X \cdot S_{C_6H_{10}} - X \cdot S_{GO} \quad (S2)$$

Therefore, the total amount of gas after the reaction for each mole of inlet acetylene is

$$8 - X \cdot S_{C_2H_4} - 2X \cdot S_{C_2H_6} - X \cdot S_{C_4H_6} - \frac{3}{2}X \cdot S_{C_4H_8} - 2X \cdot S_{C_4H_{10}} - \frac{4}{3}X \cdot S_{C_6H_{10}} - 2X \cdot S_{GO} \quad (S3)$$

with the acetylene content at the outlet

$$\frac{1 - \frac{1}{2}X \cdot S_{C_4H_6} - \frac{1}{2}X \cdot S_{C_4H_8} - \frac{1}{2}X \cdot S_{C_4H_{10}} - \frac{2}{3}X \cdot S_{C_6H_{10}} - X \cdot S_{GO}}{8 - X \cdot S_{C_2H_4} - 2X \cdot S_{C_2H_6} - X \cdot S_{C_4H_6} - \frac{3}{2}X \cdot S_{C_4H_8} - 2X \cdot S_{C_4H_{10}} - \frac{4}{3}X \cdot S_{C_6H_{10}} - 2X \cdot S_{GO}} \quad (S4)$$

By using the above equation, the volume change is incorporated into the external method.

## 1.2 Iteration method

The iteration method includes the following steps:

- (1) Denote the inlet molar flow rate of hydrocarbon gas as  $C_0$ , and the total flow rate of the inlet gas as  $N_0$ . The inlet hydrocarbon proportion is calculated as  $\alpha_0 = C_0 / N_0$ .
- (2) The inlet acetylene peak area observed from the GC chromatogram is denoted as  $A_0$ .
- (3) The outlet gas is analyzed by GC, and the peak areas of the detected species are denoted as  $A_i$ , with the correction factor denoted as  $f_i$ .
- (4) The initial guess of the conversion ( $X$ ) and selectivities ( $S_i$ ) to the detected species are calculated by the internal method.

$$X = 1 - \frac{A_{C_2H_2} * f_{C_2H_2}}{\sum A_i * f_i} \quad (S5)$$

$$S_i = \frac{A_i * f_i}{\sum A_i * f_i - A_{C_2H_2} * f_{C_2H_2}} \quad (S6)$$

- (5) The total gas change ( $\Delta N$ ) and the hydrocarbon gas change ( $\Delta C$ ) are calculated by the initial guess, and the outlet hydrocarbon proportion ( $\alpha$ ) could be roughly calculated.

$$\Delta C = \sum \beta_i * S_i * X \quad (S7)$$

$$\Delta N = \sum \gamma_i * S_i * X \quad (S8)$$

$$\alpha = (C_0 + \Delta C) / (N_0 + \Delta N) \quad (S9)$$

where  $\beta_i$  is the molar change of gaseous hydrocarbon with 1 mol  $C_2H_2$  reacted to species  $i$ ,  $\gamma_i$  is the total molar change of gas with 1 mol  $C_2H_2$  reacted to species  $i$ .

- (6) The convergence factor is defined as  $\kappa_0 = \alpha_0 / \alpha$ . Let  $k = 1$ .
- (7) The peak areas are corrected by the convergence factor  $\kappa_{k-1} * A_i * f_i$ , and the  $k$ th corrected conversion and selectivities could be obtained.

$$X = 1 - \frac{\kappa_{k-1} * A_{C_2H_2}}{A_0} \quad (S10)$$

$$S_i = \frac{\kappa_{k-1} * A_i * f_i}{(A_0 - \kappa_{k-1} * A_{C_2H_2}) * f_{C_2H_2}} \quad (S11)$$

$$S_{GO} = 1 - \sum S_i \quad (S12)$$

where  $S_{GO}$  is the green oil selectivity.

- (8) The total gas change ( $\Delta N$ ) and the hydrocarbon gas change ( $\Delta C$ ) are calculated by the  $k$ th correction according to Step (5), and the outlet hydrocarbon proportion( $\alpha$ ) could be roughly calculated by Eq (S9).
- (9) The  $k$ th convergence factor is calculated by  $\kappa_k = \alpha_0 / \alpha_k$ .
- (10) If  $|\kappa_k - \kappa_{k-1}|$  is lower than the convergence criteria, the iteration is ended; if not, let  $k=k+1$ , return to step (7).

### 1.3 Characterization details

The lattice distance, lattice parameters, and crystalline size in Table 1 were calculated using Bragg's law (Eq (S13)), the Scherrer equation (Eq (S14)), and Eq (S15) using the data at the Pd(111) crystal plane on the XRD profiles.

$$d_{(111)} = \frac{n\lambda}{2\sin\theta_{(111)}} \quad (S13)$$

$$D_{(111)} = \frac{K\lambda}{\beta_{(111)}\cos\theta_{(111)}} \quad (S14)$$

$$a(111) = \frac{\sqrt{3}n\lambda}{2\sin\theta_{(111)}} \quad (S15)$$

Where,  $d_{(111)}$  is the lattice distance of the (111) crystal plane,  $D_{(111)}$  is the average crystalline size,  $a_{(111)}$  is the lattice parameter,  $n$  is the diffraction order,  $\lambda$  is the wavelength (0.154 nm) of the electromagnetic wave generated by the electron beam bombarding the Cu target,  $\theta$  is the diffraction angle,  $K$  is the Scherrer constant (0.89), and  $\beta$  is the half-width of the diffraction peak.

The  $L_a$  values in Table 4 were calculated using the Tuinstra-Koenig equation:

$$\frac{I_D}{I_G} = \frac{C(\lambda)}{L_a} \quad (S16)$$

where  $I_D$  and  $I_G$  are the intensities of the D band and G band, respectively,  $C$  (515.5 nm) is approximately 4.4 nm. The  $L_a$  value indicates the relative proportion of ordered graphitic structures within the deposited carbon on the catalyst surface. A higher value implies a greater degree of ordered graphitization in the deposited carbon.

## 2. Supplementary tables

Table S1 Apparent activation energies of the investigated catalysts

| Catalyst                                          | Apparent activation energy (kJ · mol <sup>-1</sup> ) |
|---------------------------------------------------|------------------------------------------------------|
| Pd/SiO <sub>2</sub>                               | 60.4                                                 |
| Pd <sub>3</sub> Mo <sub>1</sub> /SiO <sub>2</sub> | 48.3                                                 |
| Pd <sub>1</sub> Mo <sub>1</sub> /SiO <sub>2</sub> | 46.5                                                 |
| Pd <sub>1</sub> Mo <sub>3</sub> /SiO <sub>2</sub> | 47.2                                                 |

Table S2 Bader charge for C<sub>2</sub>H<sub>2</sub> stabilized adsorption on Pd(111) and Pd<sub>1</sub>Mo<sub>1</sub>(111) surfaces

| No. | Pd(111) |           | Pd <sub>1</sub> Mo <sub>1</sub> (111) |           |
|-----|---------|-----------|---------------------------------------|-----------|
|     | Element | charges   | Element                               | charges   |
| 1   | Pd      | -0.003239 | Pd                                    | -0.001295 |
| 2   | Pd      | -0.005759 | Pd                                    | -0.002380 |
| 3   | Pd      | -0.005384 | Pd                                    | 0.001290  |
| 4   | Pd      | -0.006156 | Pd                                    | -0.003531 |
| 5   | Pd      | -0.013275 | Pd                                    | 0.018221  |
| 6   | Pd      | -0.011743 | Pd                                    | 0.023730  |
| 7   | Pd      | -0.007191 | Mo                                    | -0.002288 |
| 8   | Pd      | -0.007830 | Mo                                    | -0.004090 |
| 9   | Pd      | -0.047973 | Mo                                    | -0.007090 |
| 10  | Pd      | 0.084174  | Mo                                    | -0.006966 |
| 11  | Pd      | 0.048786  | Mo                                    | 0.027334  |
| 12  | Pd      | 0.046407  | Mo                                    | 0.022939  |
| 13  | C       | -0.024290 | C                                     | -0.032266 |
| 14  | C       | -0.043909 | C                                     | -0.027381 |
| 15  | H       | -0.002350 | H                                     | -0.002735 |
| 16  | H       | -0.000267 | H                                     | -0.003491 |

Table S3 Bader charge for C<sub>2</sub>H<sub>4</sub> stabilized adsorption on Pd(111) and Pd<sub>1</sub>Mo<sub>1</sub>(111) surfaces

| No. | Pd(111) |           | Pd <sub>1</sub> Mo <sub>1</sub> (111) |           |
|-----|---------|-----------|---------------------------------------|-----------|
|     | Element | charges   | Element                               | charges   |
| 1   | Pd      | -0.002099 | Pd                                    | -0.002469 |
| 2   | Pd      | -0.002640 | Pd                                    | -0.002589 |
| 3   | Pd      | -0.004315 | Pd                                    | -0.003489 |
| 4   | Pd      | -0.004896 | Pd                                    | 0.000558  |
| 5   | Pd      | -0.009660 | Pd                                    | -0.018287 |
| 6   | Pd      | -0.008806 | Pd                                    | -0.007887 |
| 7   | Pd      | -0.005312 | Mo                                    | 0.001232  |
| 8   | Pd      | -0.005098 | Mo                                    | -0.000623 |
| 9   | Pd      | -0.012511 | Mo                                    | -0.007866 |
| 10  | Pd      | -0.021350 | Mo                                    | -0.004618 |
| 11  | Pd      | 0.041957  | Mo                                    | 0.040194  |
| 12  | Pd      | 0.042285  | Mo                                    | 0.011444  |
| 13  | C       | 0.016205  | C                                     | 0.029121  |
| 14  | C       | -0.021503 | C                                     | -0.033705 |
| 15  | H       | -0.000630 | H                                     | -0.000310 |
| 16  | H       | -0.000360 | H                                     | -0.000335 |
| 17  | H       | -0.000908 | H                                     | -0.000371 |
| 18  | H       | -0.000346 | H                                     | 0         |

Table S4 Average Bader charge analysis for the stable adsorption of C<sub>2</sub>H<sub>2</sub> and C<sub>2</sub>H<sub>4</sub>

| charge transferred/eV         | Pd(111) |     | Pd <sub>1</sub> Mo <sub>1</sub> (111) |       |
|-------------------------------|---------|-----|---------------------------------------|-------|
|                               | Pd      | --- | Pd                                    | Mo    |
| C <sub>2</sub> H <sub>2</sub> | 0.071   | --- | 0.042                                 | 0.050 |
| C <sub>2</sub> H <sub>4</sub> | 0.050   | --- | -0.011                                | 0.052 |

Table S5 Activation barriers of the two most probable 1,3-butadiene formation pathways

| Pathway I                             | TS1-1                            | TS3                                                          | TS5                              |
|---------------------------------------|----------------------------------|--------------------------------------------------------------|----------------------------------|
|                                       | C <sub>2</sub> H <sub>2</sub> +H | C <sub>2</sub> H <sub>2</sub> +C <sub>2</sub> H <sub>3</sub> | C <sub>4</sub> H <sub>5</sub> +H |
| Pd(111)                               | 0.97                             | 0.92                                                         | 0.78                             |
| Pd <sub>1</sub> Mo <sub>1</sub> (111) | 1.33                             | 1.04                                                         | 1.41                             |
| Pathway II                            | TS1-1                            | TS4                                                          |                                  |
|                                       | C <sub>2</sub> H <sub>2</sub> +H | C <sub>2</sub> H <sub>3</sub> +C <sub>2</sub> H <sub>3</sub> |                                  |
| Pd(111)                               | 0.97                             | 0.89                                                         |                                  |
| Pd <sub>1</sub> Mo <sub>1</sub> (111) | 1.33                             | 1.10                                                         |                                  |

### 3. Supplementary figures

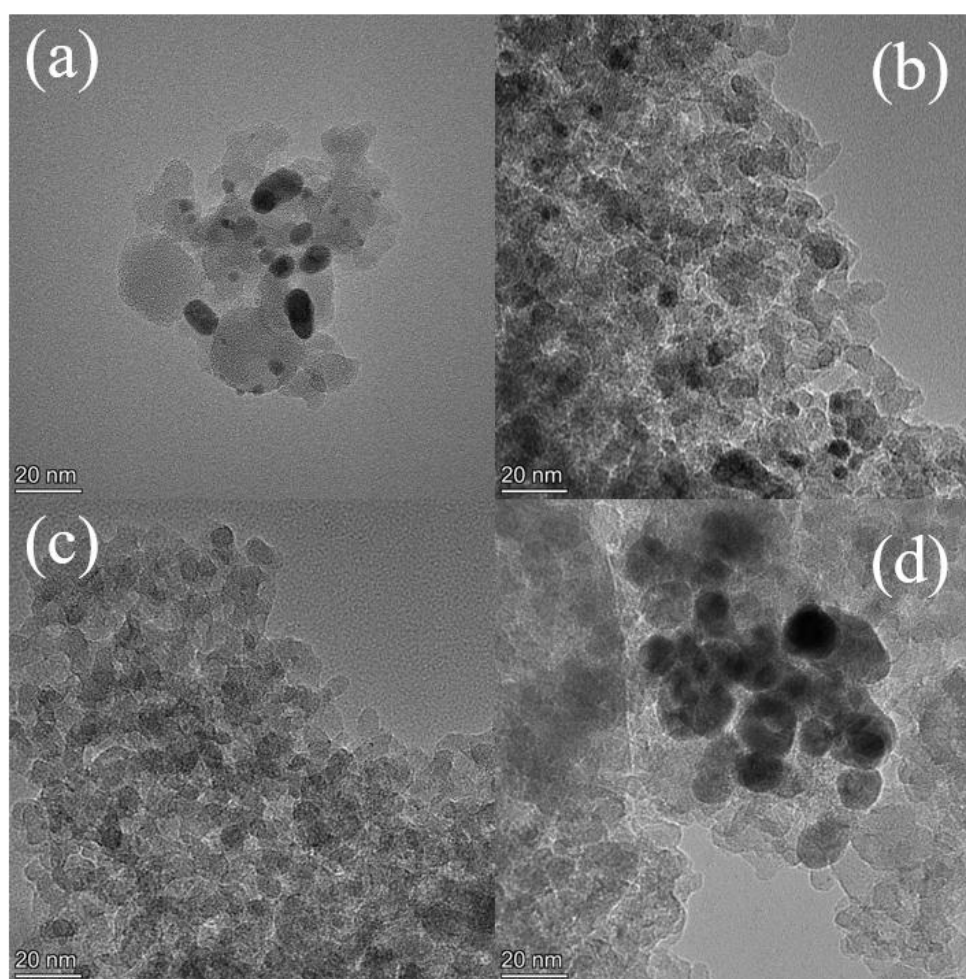

Figure S1 TEM images at 20 nm of (a) Pd/SiO<sub>2</sub>, (b) Pd<sub>3</sub>Mo<sub>1</sub>/SiO<sub>2</sub>, (c) Pd<sub>1</sub>Mo<sub>1</sub>/SiO<sub>2</sub>, (d)Pd<sub>1</sub>Mo<sub>3</sub>/SiO<sub>2</sub>

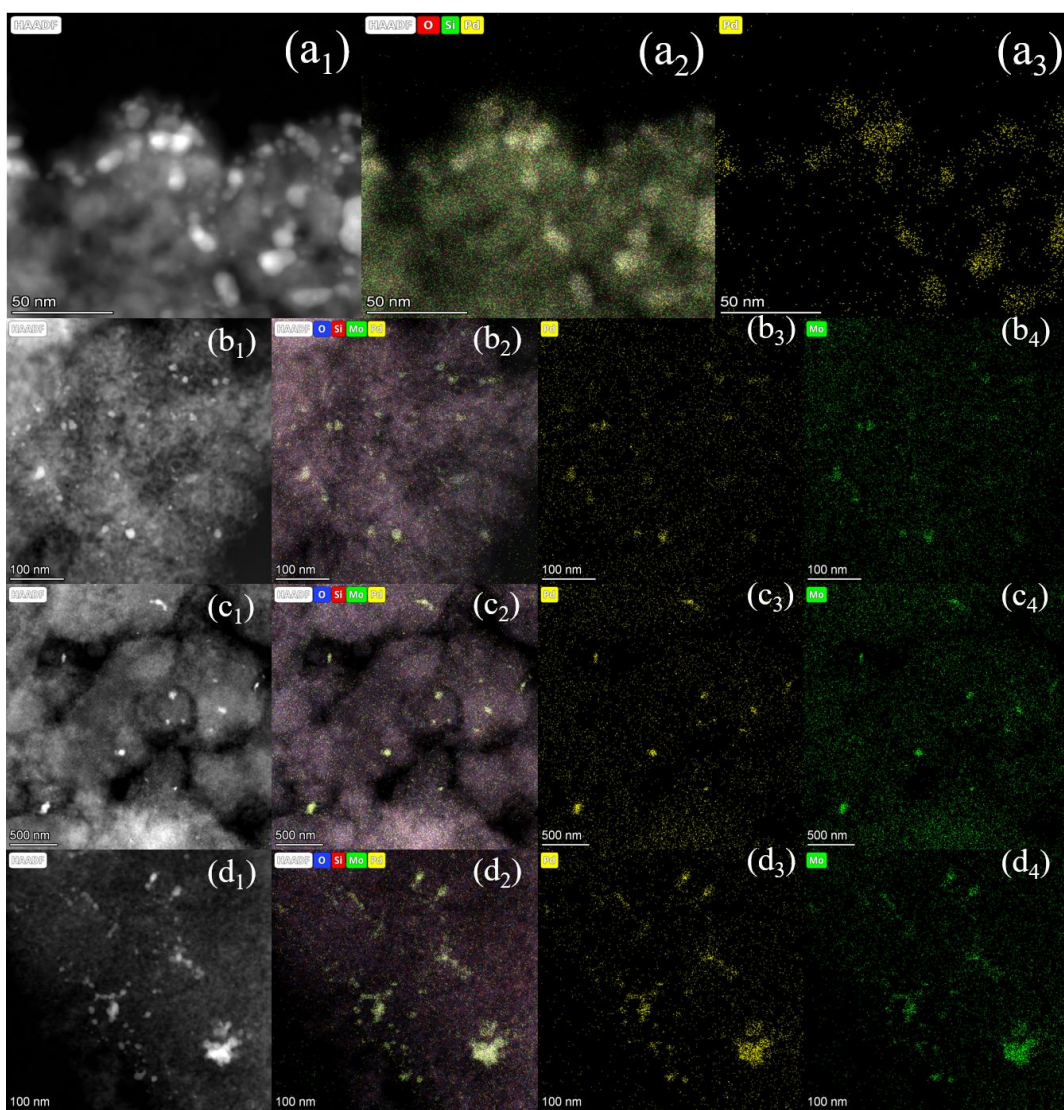

Figure S2 EDS elemental mapping of the unsupported nanoparticles:

(a<sub>1</sub>-a<sub>3</sub>) Pd/SiO<sub>2</sub>, (b<sub>1</sub>-b<sub>4</sub>) Pd<sub>3</sub>Mo<sub>1</sub>/SiO<sub>2</sub>, (c<sub>1</sub>-c<sub>4</sub>) Pd<sub>3</sub>Mo<sub>1</sub>/SiO<sub>2</sub> and (d<sub>1</sub>-d<sub>4</sub>) Pd<sub>1</sub>Mo<sub>3</sub>/SiO<sub>2</sub>

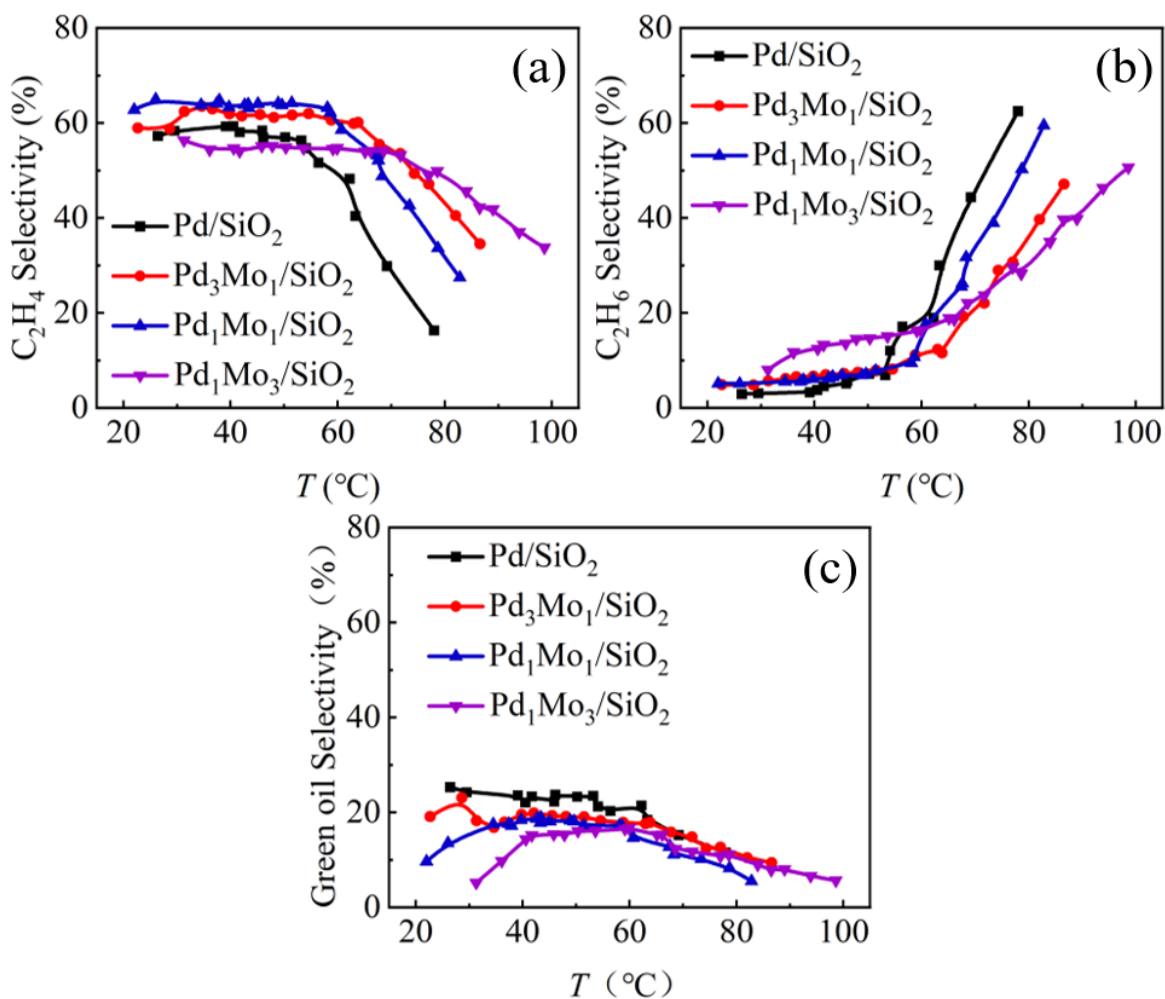

Figure S3 Product selectivities at the different temperatures in acetylene hydrogenation:  
 (a) ethylene, (b) ethane, and (c) green oil. ( $\text{C}_2\text{H}_2 : \text{H}_2 : \text{N}_2 = 1:3:4$ ;  $\text{GHSV} = 60000 \text{ mL g}^{-1} \text{ h}^{-1}$ ).

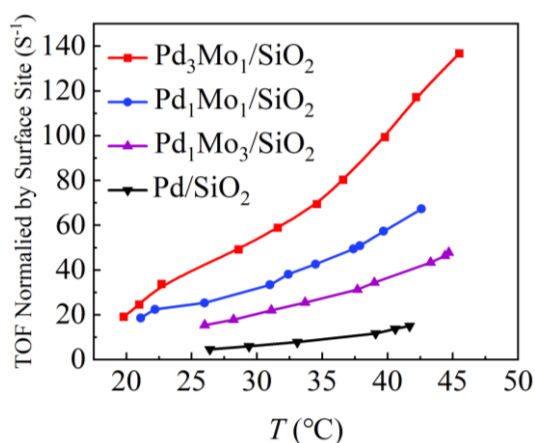

Figure S4 TOFs normalized by surface sites over the investigated catalysts.  
 ( $\text{C}_2\text{H}_2 : \text{H}_2 : \text{N}_2 = 1:3:4$ ;  $\text{GHSV} = 60000 \text{ mL g}^{-1} \text{ h}^{-1}$ ).

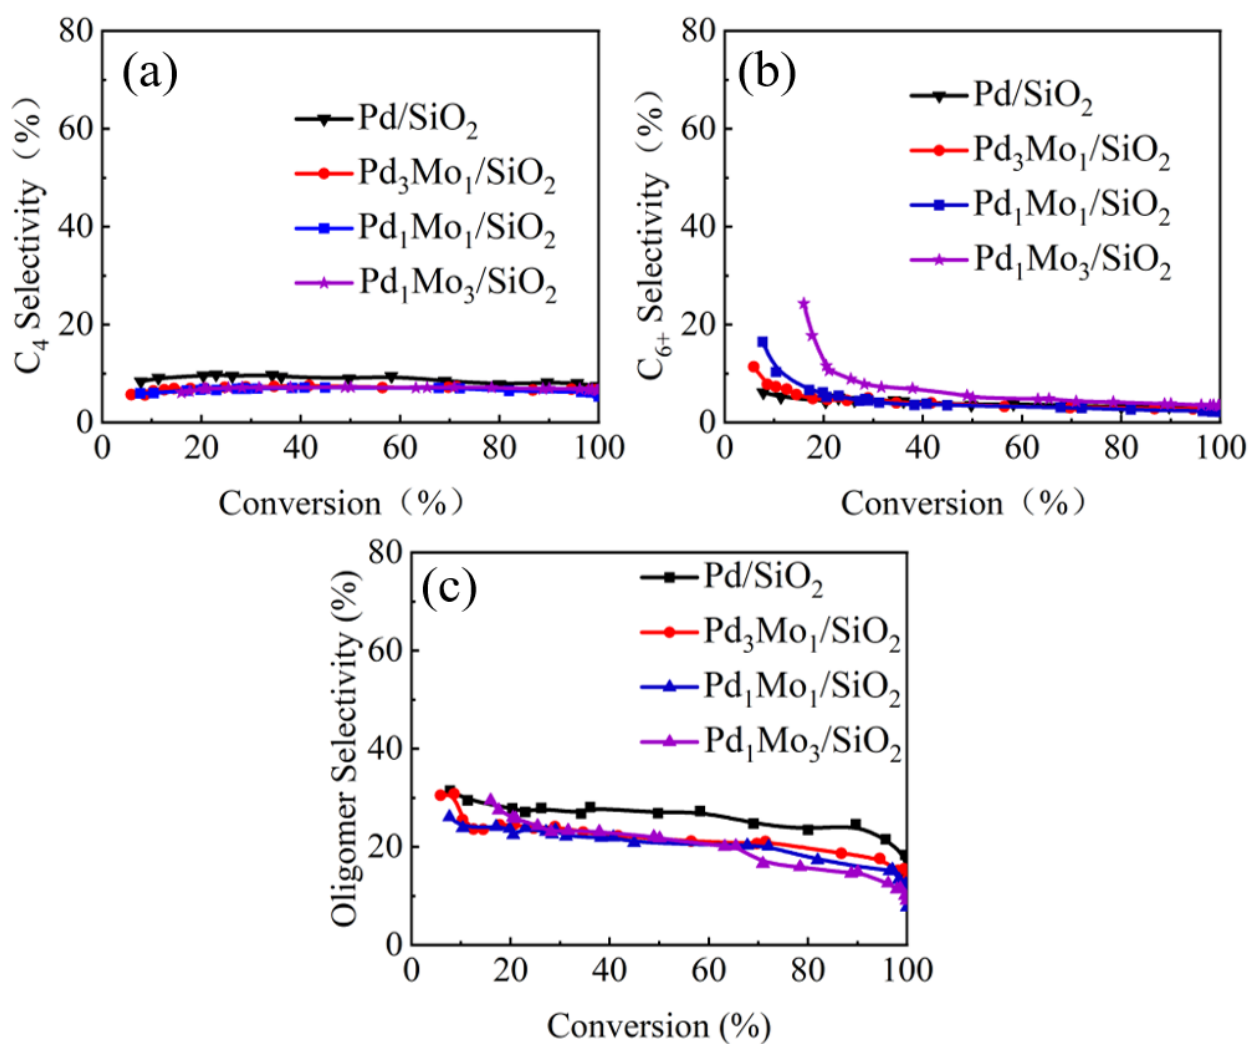

Figure S5 Product selectivities as a function of acetylene conversion:

(a) C<sub>4</sub>, (b) C<sub>6+</sub> and (c) oligomer. (C<sub>2</sub>H<sub>2</sub> : H<sub>2</sub> : N<sub>2</sub> = 1:3:4; GHSV = 60000 mL g<sup>-1</sup> h<sup>-1</sup>)

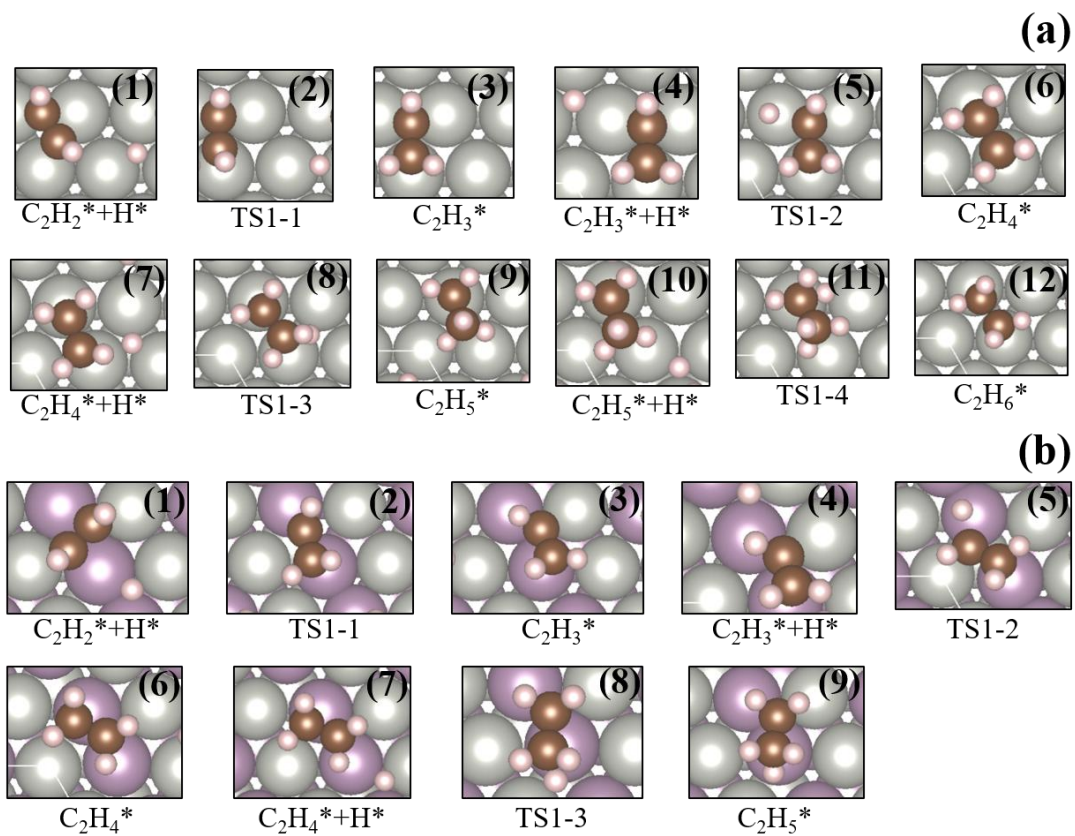

Figure S6 The optimized configurations of transition states involved in the acetylene hydrogenation on  
 (a) Pd(111) and (b) Pd<sub>1</sub>Mo<sub>1</sub>(111) surfaces.

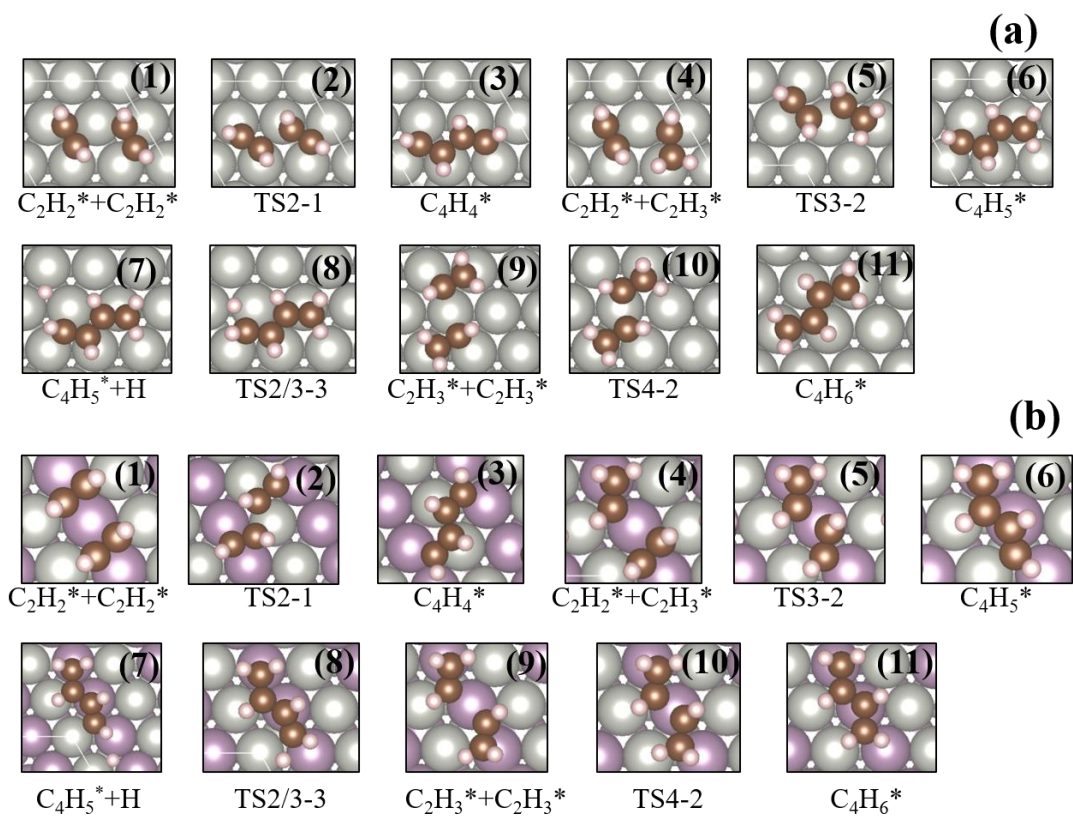

Figure S7 The optimized configurations of transition states involved in the acetylene dimerization reaction on (a) Pd(111) and (b) Pd<sub>1</sub>Mo<sub>1</sub>(111) surfaces.

## References

- [1] G. Kresse, J. Furthmüller, Efficient iterative schemes for ab initio total-energy calculations using a plane-wave basis set, *Phys. Rev. B* 54 (16) (1996) 11169.
- [2] G. Kresse, D. Joubert, From ultrasoft pseudopotentials to the projector augmented-wave method, *Phys. Rev. B* 59 (3) (1999) 1758.
- [3] J. P. Perdew, K. Burke, Ernzerhof, M., Generalized gradient approximation made simple, *Phys. Rev. Lett.* 77 (18) (1996) 3865.
- [4] H. J. Monkhorst, J. D. Pack, Special points for Brillouin-zone integrations, *Phys. Rev. B* 13 (12) (1976) 5188.
- [5] S. Grimme, J. Antony, S. Ehrlich, H. Krieg, A consistent and accurate ab initio parametrization of density functional dispersion correction (DFT-D) for the 94 elements H-Pu, *J. Chem. Phys.* 132 (15) 2010 154104.
